# Supplementary material for: Relative Changes from Prior Reward Contingencies Can Constrain Brain Correlates of Outcome Monitoring
Source: PubMed Central journal article supplement (PMC3688785; doi:10.1371/journal.pone.0066350), 2013-06-20
Supplement: pone.0066350.s004.pdf [file pone.0066350.s004.pdf]

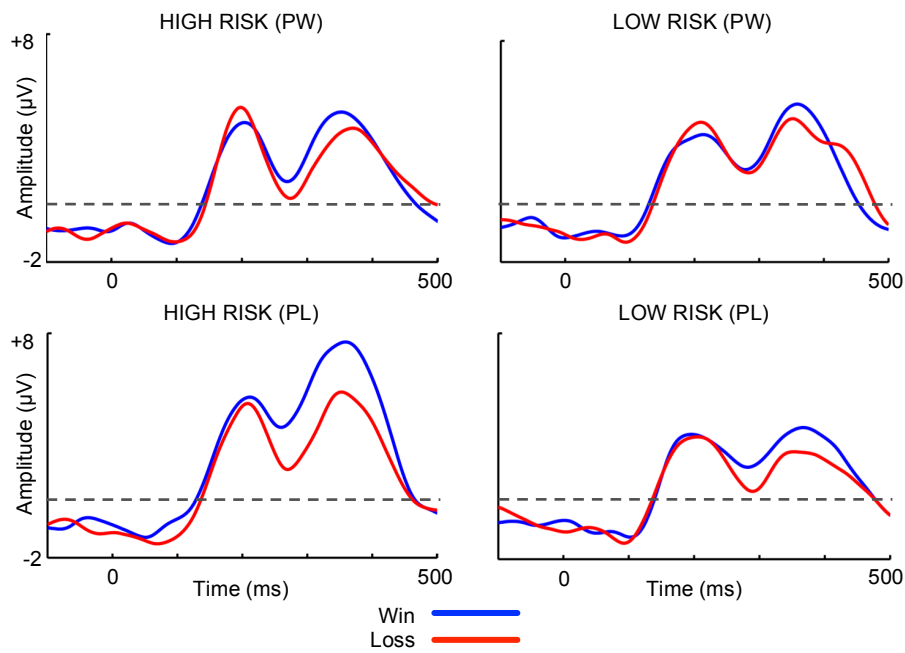

**Figure S4- FRN for high and low-risk takers in subjective blocks.** Averaged ERP waveforms from the MFC cluster for the FRN plotting ERPs to Wins and Losses separately for high (left) and low (right) risk-takers within the subjective reward probability blocks (PW; top, PL; bottom).
