# Supplementary material for: Relative Changes from Prior Reward Contingencies Can Constrain Brain Correlates of Outcome Monitoring
Source: PubMed Central journal article supplement (PMC3688785; doi:10.1371/journal.pone.0066350), 2013-06-20
Supplement: pone.0066350.s006.pdf [file pone.0066350.s006.pdf]

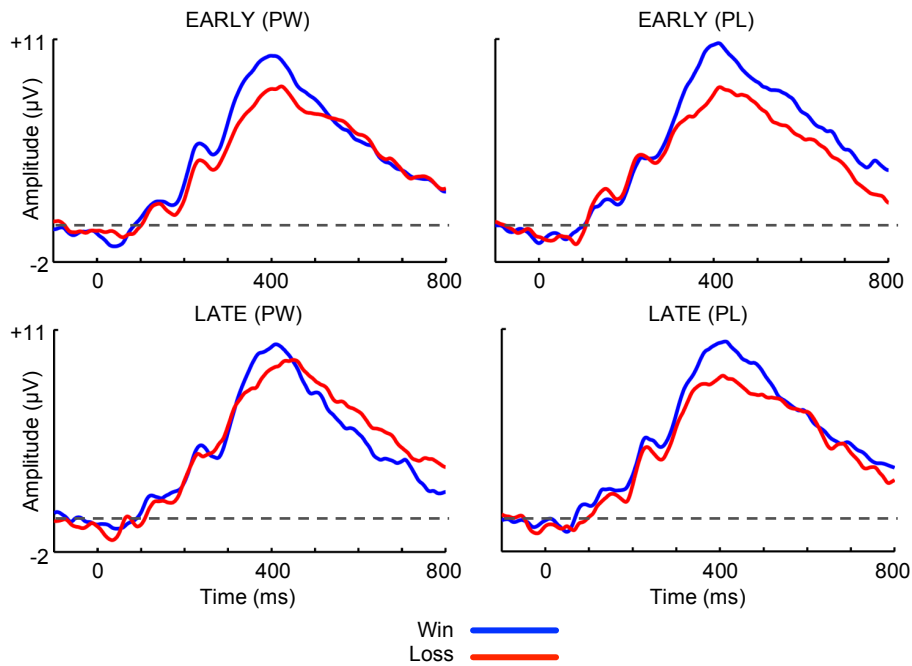

**Figure S6- P3 for early and late stages of blocks.** Averaged ERP waveforms for the P3 plotting ERPs to Wins and Losses separately for early (top) and late (bottom) stages within the PW (left) and PL (right) blocks from the Midline Parietal Cluster.
