# Supplementary material for: Relative Changes from Prior Reward Contingencies Can Constrain Brain Correlates of Outcome Monitoring
Source: PubMed Central journal article supplement (PMC3688785; doi:10.1371/journal.pone.0066350), 2013-06-20
Supplement: pone.0066350.s007.pdf [file pone.0066350.s007.pdf]

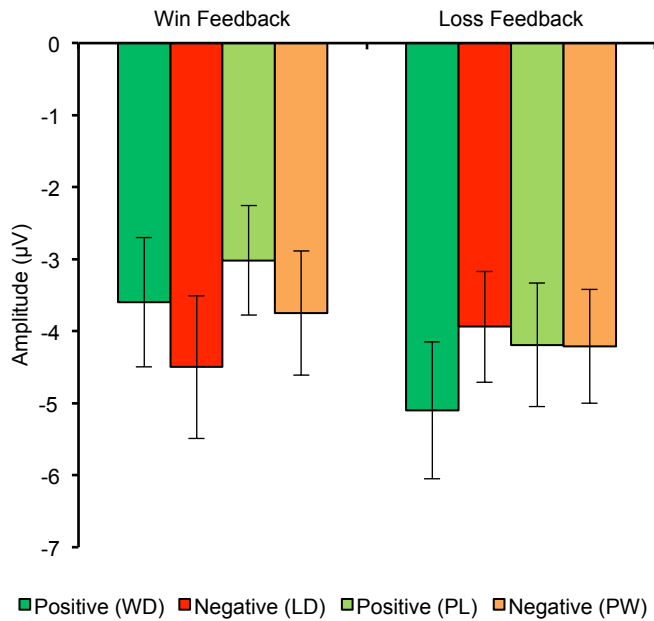

**Figure S7- Valence specific contrasts.** We used one-tailed t-tests to examine if FRN activity was more negative for unexpected rather than expected contexts. For Wins, both WD-LD and PL-PW contrast were significant ( $p \leq .05$ ). For Losses, WD-LD was significant ( $p < .05$ ), but not PL-PW ( $t < 1.0$ ). We thank an anonymous reviewer for suggesting this analysis. However, these results have to be considered with caution given that the EVal X EType X Feedback was not significant.
