# Supplementary material for: Relative Changes from Prior Reward Contingencies Can Constrain Brain Correlates of Outcome Monitoring
Source: PubMed Central journal article supplement (PMC3688785; doi:10.1371/journal.pone.0066350), 2013-06-20
Supplement: pone.0066350.s009.pdf [file pone.0066350.s009.pdf]

**Table S1- Frequency of choices across blocks.**

| EType      | EVal     | Choice | Frequency (+/- 1 SEM) |
|------------|----------|--------|-----------------------|
| Objective  | Positive | Risk   | 47.23 (2.62)          |
|            |          | Safe   | 48.09 (2.55)          |
|            | Negative | Risk   | 41.18 (2.73)          |
|            |          | Safe   | 46.73 (3.11)          |
| Subjective | Positive | Risk   | 45.32 (2.48)          |
|            |          | Safe   | 50.27 (2.45)          |
|            | Negative | Risk   | 44.09 (2.56)          |
|            |          | Safe   | 51.14 (2.47)          |
