# Supplementary material for: Relative Changes from Prior Reward Contingencies Can Constrain Brain Correlates of Outcome Monitoring
Source: PubMed Central journal article supplement (PMC3688785; doi:10.1371/journal.pone.0066350), 2013-06-20
Supplement: pone.0066350.s010.pdf [file pone.0066350.s010.pdf]

**Table S2- RTs for choices across blocks.**

| EType      | EVal     | Choice | RT (ms, +/- 1 SEM) |
|------------|----------|--------|--------------------|
| Objective  | Positive | Risk   | 542 (25)           |
|            |          | Safe   | 568 (30)           |
|            | Negative | Risk   | 557 (24)           |
|            |          | Safe   | 546 (26)           |
| Subjective | Positive | Risk   | 572 (25)           |
|            |          | Safe   | 568 (28)           |
|            | Negative | Risk   | 543 (24)           |
|            |          | Safe   | 544 (26)           |
