# Supplementary material for: Relative Changes from Prior Reward Contingencies Can Constrain Brain Correlates of Outcome Monitoring
Source: PLOS journal article supplement (doi:10.1371/journal.pone.0066350), 2013-06-20
Supplement: S11 (10.1371/journal.pone.0066350.s011) [file journal.pone.0066350.s011]

**Table S3- Participant numbers for high risk vs. low risk separation.**

| Block | High Risk | Low Risk |
|-------|-----------|----------|
| WD    | 10        | 12       |
| LD    | 11        | 10       |
| PL    | 8         | 13       |
| PW    | 9         | 12       |
